# Supplementary material for: Educational readiness among health professionals in rheumatology: low awareness of EULAR offerings and unfamiliarity with the course content as major barriers—results of a EULAR-funded European survey
Source: HighWire-hosted journal article supplement (doi:10.1136/rmdopen-2023-003120), 2023-05-01
Supplement: rmdopen-2023-003120supp003_data_supplement.pdf [file rmdopen-2023-003120supp003_data_supplement.pdf]

## Supplement Table C:

**Table C. Multiple logistic regression models.** We conducted a logistic regression analysis to quantify and estimate the extent of the relationship between the different variables. The dependent variable in the regression analysis was awareness of EULAR, awareness of ESOR and whether the annual EULAR congress had ever been attended.

| Variable                                                                          | Estimate     | Odds Ratio  | CI 2.5 %     | CI 97.5 %    | Significance |
|-----------------------------------------------------------------------------------|--------------|-------------|--------------|--------------|--------------|
| <b>Ever heard of EULAR</b>                                                        |              |             |              |              |              |
| (Intercept)                                                                       | -2.13        | 0.12        | 0.12         | 0.68         | *            |
| Male (compared to female)                                                         | 0.23         | 1.26        | 0.65         | 0.91         | ns           |
| <b>Gender prefer not to answer (compared to female)</b>                           | <b>-3.42</b> | <b>0.03</b> | <b>0.001</b> | <b>0.51</b>  | <b>*</b>     |
| <b>Age (in years)</b>                                                             | <b>0.06</b>  | <b>1.06</b> | <b>1.02</b>  | <b>1.11</b>  | <b>**</b>    |
| <b>Working pediatrics (compared adults)</b>                                       | <b>-1.75</b> | <b>0.17</b> | <b>0.05</b>  | <b>0.55</b>  | <b>**</b>    |
| <b>Nurse (compared being no nurse)</b>                                            | <b>1.24</b>  | <b>3.45</b> | <b>1.24</b>  | <b>10.00</b> | <b>*</b>     |
| <b>Occupational therapist (compared being no occupational therapist)</b>          | <b>-1.28</b> | <b>0.28</b> | <b>0.10</b>  | <b>0.73</b>  | <b>*</b>     |
| Physiotherapist (compared being no physiotherapist)                               | -0.42        | 0.66        | 0.26         | 1.58         | ns           |
| Certificate/Diploma, not equalling a Bachelor's degree (compared Bachelor degree) | -0.13        | 0.88        | 0.25         | 3.26         | ns           |
| Master's degree or similar (compared Bachelor degree)                             | 0.47         | 1.60        | 0.86         | 3.00         | ns           |
| PhD (compared Bachelor degree)                                                    | 0.56         | 1.75        | 0.55         | 6.36         | ns           |
| <b>Experience (in years)</b>                                                      | <b>0.05</b>  | <b>1.05</b> | <b>1.00</b>  | <b>1.11</b>  | <b>*</b>     |
| Working time clinical tasks (in hours per week)                                   | -0.01        | 0.99        | 0.97         | 1.01         | ns           |
| <b>Working time Research/Education (in hours per week)</b>                        | <b>0.03</b>  | <b>1.03</b> | <b>1.00</b>  | <b>1.07</b>  | <b>+</b>     |
| Working time other/organisational tasks (in hours per week)                       | -0.01        | 0.99        | 0.96         | 1.03         | ns           |
| <b>Ever visited the annual meeting</b>                                            |              |             |              |              |              |
| (Intercept)                                                                       | -3.90        | 0.02        | 0            | 0.13         | ***          |
| Male (compared to female)                                                         | -0.18        | 0.84        | 0.4          | 1.72         | ns           |
| Gender prefer not to answer (compared to female)                                  | -1.40        | 0.25        | 0.01         | 3.25         | ns           |
| Age (in years)                                                                    | 0.03         | 1.03        | 0.99         | 1.07         | ns           |
| <b>Working pediatrics (compared adults)</b>                                       | <b>-1.65</b> | <b>0.19</b> | <b>0.03</b>  | <b>0.83</b>  | <b>+</b>     |
| <b>Nurse (compared being no nurse)</b>                                            | <b>0.85</b>  | <b>2.35</b> | <b>0.98</b>  | <b>5.87</b>  | <b>+</b>     |
| Occupational therapist (compared being no occupational therapist)                 | -0.68        | 0.51        | 0.17         | 1.51         | ns           |
| Physiotherapist (compared being no physiotherapist)                               | -0.48        | 0.62        | 0.25         | 1.53         | ns           |
| Certificate/Diploma, not equalling a Bachelor's degree (compared Bachelor degree) | -0.25        | 0.78        | 0.22         | 2.46         | ns           |
| <b>Master's degree or similar (compared Bachelor degree)</b>                      | <b>0.94</b>  | <b>2.56</b> | <b>1.32</b>  | <b>5.05</b>  | <b>**</b>    |
| <b>PhD (compared Bachelor degree)</b>                                             | <b>2.01</b>  | <b>7.50</b> | <b>2.78</b>  | <b>21.27</b> | <b>***</b>   |
| <b>Experience (in years)</b>                                                      | <b>0.06</b>  | <b>1.06</b> | <b>1.02</b>  | <b>1.11</b>  | <b>**</b>    |
| Working time clinical tasks (in hours per week)                                   | -0.0002      | 1.00        | 0.98         | 1.02         | ns           |
| <b>Working time Research/Education (in hours per week)</b>                        | <b>0.05</b>  | <b>1.05</b> | <b>1.02</b>  | <b>1.09</b>  | <b>**</b>    |
| Working time other/organisational tasks (in hours per week)                       | 0.01         | 1.01        | 0.97         | 1.05         | ns           |
| <b>Ever heard of ESOR</b>                                                         |              |             |              |              |              |
| (Intercept)                                                                       | -3.75        | 0.02        | 0.00         | 0.12         | ***          |
| Male (compared to female)                                                         | -0.14        | 0.87        | 0.47         | 1.60         | ns           |
| <b>Age (in years)</b>                                                             | <b>0.05</b>  | <b>1.06</b> | <b>1.02</b>  | <b>1.10</b>  | <b>**</b>    |
| <b>Working pediatrics (compared adults)</b>                                       | <b>-1.13</b> | <b>0.32</b> | <b>0.08</b>  | <b>1.03</b>  | <b>+</b>     |

|                                                                                   |              |             |             |             |           |
|-----------------------------------------------------------------------------------|--------------|-------------|-------------|-------------|-----------|
| Nurse (compared being no nurse)                                                   | -0.03        | 0.97        | 0.44        | 2.16        | ns        |
| <b>Occupational therapist (compared being no occupational therapist)</b>          | <b>-0.87</b> | <b>0.42</b> | <b>0.16</b> | <b>1.09</b> | <b>+</b>  |
| Physiotherapist (compared being no physiotherapist)                               | 0.34         | 1.41        | 0.65        | 3.12        | ns        |
| Certificate/Diploma, not equalling a Bachelor's degree (compared Bachelor degree) | -0.23        | 0.79        | 0.26        | 2.23        | ns        |
| <b>Master's degree or similar (compared Bachelor degree)</b>                      | <b>0.65</b>  | <b>1.92</b> | <b>1.09</b> | <b>3.41</b> | <b>*</b>  |
| <b>PhD (compared Bachelor degree)</b>                                             | <b>1.31</b>  | <b>3.70</b> | <b>1.46</b> | <b>9.77</b> | <b>**</b> |
| Experience (in years)                                                             | 0.03         | 1.03        | 0.99        | 1.07        | ns        |
| Working time clinical tasks (in hours per week)                                   | 0.01         | 1.01        | 0.99        | 1.03        | ns        |
| Working time Research/Education (in hours per week)                               | 0.02         | 1.02        | 0.99        | 1.04        | ns        |
| Working time other/organisational tasks (in hours per week)                       | -0.01        | 0.99        | 0.95        | 1.02        | ns        |

| Variable                                                                          | Estimate     | Odds Ratio  | CI 2.5 %    | CI 97.5 %   | Significance |
|-----------------------------------------------------------------------------------|--------------|-------------|-------------|-------------|--------------|
| <b>Ever attended a course of ESOR</b>                                             |              |             |             |             |              |
| (Intercept)                                                                       | 0.47         | 1.60        | 0.02        | 123.03      | ns           |
| Male (compared to female)                                                         | 0.15         | 1.16        | 0.32        | 4.38        | ns           |
| Age (in years)                                                                    | 0.05         | 1.05        | 0.97        | 1.14        | ns           |
| Nurse (compared being no nurse)                                                   | 0.96         | 2.61        | 0.46        | 15.70       | ns           |
| Occupational therapist (compared being no occupational therapist)                 | -0.65        | 0.52        | 0.04        | 6.55        | ns           |
| Physiotherapist (compared being no physiotherapist)                               | -0.02        | 0.98        | 0.19        | 5.04        | ns           |
| Certificate/Diploma, not equalling a Bachelor's degree (compared Bachelor degree) | na           | na          | na          | na          | na           |
| Master's degree or similar (compared Bachelor degree)                             | -0.31        | 0.74        | 0.16        | 3.36        | ns           |
| PhD (compared Bachelor degree)                                                    | -1.59        | 0.20        | 0.02        | 1.45        | ns           |
| <b>Experience (in years)</b>                                                      | <b>-0.10</b> | <b>0.91</b> | <b>0.81</b> | <b>0.99</b> | <b>*</b>     |
| Working time clinical tasks (in hours per week)                                   | -0.04        | 0.96        | 0.81        | 1.02        | ns           |
| Working time Research/Education (in hours per week)                               | 0.00         | 1.00        | 0.94        | 1.08        | ns           |
| Working time other/organisational tasks (in hours per week)                       | 0.06         | 1.06        | 0.96        | 1.20        | ns           |

\*Signif. codes: \*\*\* =  $p < 0.001$ ; \*\* =  $p < 0.001$ ; \* =  $p < 0.01$ ; + =  $p < 0.05$ ; ns =  $p > 0.05$
